# Supplementary material for: Initial Maintenance of Attention to Threat in Children with Social Anxiety Disorder? Findings from an Eye-Tracking Experiment
Source: Springer Nature journal article supplement (doi:10.1007/s10608-021-10244-2), 2021-06-29
Supplement: MOESM1 [file 19313644]

**Electronic supplement**

Table 2

*Detailed statistical values of the anlyses, which were performed post-hoc to test the hypotheses after the exclusion of outliers*

|  | | *df* | Test value | *p* | Effect size |
| --- | --- | --- | --- | --- | --- |
| Length of first fixation – hypothesis 1 | |  |  |  |  |
| angry vs. neutral faces in SAD | 49 | *Z* = -0.51 | .61 | *d* = 0.15 |
| Length of first fixation – hypotheses 2 + 3 | |  |  |  |  |
| age | 1, 87 | *F* = 0.07 | .79 | ηp2 = .001 |
| group | 1, 87 | *F* = 8.06 | .01 | ηp2 = .085 |
| stress induction condition | 1, 87 | *F* = 0.45 | .50 | ηp2 = .005 |
| group * stress induction condition | 1, 87 | *F* = 0.02 | .90 | ηp2 < .001 |
| facial expression | 1, 87 | *F* < 0.01 | .96 | ηp2 < .001 |
| facial expression * age | 1, 87 | *F* < 0.01 | .97 | ηp2 < .001 |
| facial expression * group | 1, 87 | *F* = 0.37 | .54 | ηp2 = .004 |
| facial expression * stress induction condition | 1, 87 | *F* = 0.96 | .33 | ηp2 = .011 |
| facial expression *group * stress induction condition | 1, 87 | *F* = 3.04 | .09 | ηp2 = .034 |
| First run dwell time – hypothesis 1 | |  |  |  |  |
| angry vs. neutral faces in SAD | 47 | *Z* = -1.14 | .25 | *d* = 0.34 |
| First run dwell time– hypotheses 2 + 3 | |  |  |  |  |
| age | 1, 87 | *F* = 6.07 | .02 | ηp2 = .065 |
| group | 1, 87 | *F* = 0.80 | .37 | ηp2 = .009 |
| stress induction condition | 1, 87 | *F* = 6.28 | .01 | ηp2 = .067 |
| group * stress induction condition | 1, 87 | *F* = 3.95 | .05 | ηp2 = .043 |
| facial expression | 1, 87 | *F* = 1.21 | .29 | ηp2 = .013 |
| facial expression * age | 1, 87 | *F* = 1.82 | .18 | ηp2 = .021 |
| facial expression * group | 1, 87 | *F* = 0.93 | .34 | ηp2 = .011 |
| facial expression * stress induction condition | 1, 87 | *F* = 2.09 | .15 | ηp2 = .023 |
| facial expression *group * stress induction condition | | 1, 87 | *F* = 2.60 | .11 | ηp2 = .029 |

***Initial maintenance of attention* as a function of *initial hypervigilance***

Alike previous studies (Dodd et al., 2015; Liang et al., 2017), the sum of all first fixation durations to angry and accordingly neutral faces was divided by the number of trials where the first fixation fell on the corresponding face. The length of first fixation was analyzed within children with SAD using a paired-sample *t*-test and between children with SAD and HC children using a three-way mixed ANOVA. Spearman coefficients were computed post-hoc to investigate the association between the length of first fixation and self-reported symptom severity.

The mean length of first fixation, calculated as a function of initial hypervigilance, is displayed in Figure 3.

*Figure 3*. Length of first fixation in milliseconds by group and condition, calculated as a function of initial hypervigilance. *Note.* SI = stress induction.

There was no significant difference within children with SAD in the length of first fixation to angry vs. neutral faces. Furthermore, the ANOVA revealed no significant main or interaction effects. All statistical details are presented in table 3.

Table 3

*Detailed statistical values of the additional analyses, which were performed with the length of first fixation, calculated as a function of initial hypervigilance*

|  | | *df* | Test value | *p* | ηp2 = |
| --- | --- | --- | --- | --- | --- |
| Hypothesis 1: paired-sample *t*-test | |  |  |  |  |
| angry vs. neutral faces in SAD | 49 | *t* = 0.21 | .84 | *d* = 0.018 |
| Hypotheses 2 and 3: 2 x 2 x (2) ANOVA | |  |  |  |  |
| group | 1, 92 | *F* = 2.81 | .10 | ηp2 = .030 |
| stress induction condition | 1, 92 | *F* = 2.80 | .10 | ηp2 = .030 |
| group * stress induction condition | 1, 92 | *F* = 0.25 | .62 | ηp2 = .003 |
| facial expression | 1, 92 | *F* = 0.02 | .89 | ηp2 < .001 |
| facial expression * group | 1,92 | *F* = 0.12 | .73 | ηp2 = .001 |
| facial expression * stress induction condition | 1, 92 | *F* = 2.15 | .15 | ηp2 = .023 |
| facial expression *group * stress induction condition | | 1, 92 | *F* = 2.61 | .11 | ηp2 = .028 |

***Initial hypervigilance* – proportion of first fixation and time to first fixation**

The proportion of first fixation to angry and neutral faces, respectively, was reanalyzed in the present sample. According to previous studies (e.g., Dodd et al. 2014; Garner et al. 2006), a bias score was calculated, dividing the number of trials in which the first fixation made to stimuli fell on the angry face by the number of trials in which at least one stimulus was fixated. A first fixation bias score > 0.50 indicated an initial orientation towards the angry face, while a score < 0.50 indicated an initial orientation towards the neutral face. First fixation bias scores were in line with our previous findings, rather proposing initial avoidance of than hypervigilance to angry faces in children with SAD (*M* = .47, *SD* = .09) as well as in HC children (*M* = .46, *SD* = .10). The probability of first fixation to angry faces did not differ between groups (*p* = .58). Children, who were assigned to a stress induction procedure showed a greater bias score (*M* = .49, *SD* = .08) than those children, who were not (*M* = .45, *SD* = .10). However, this effect slightly missed statistical significance (*p* = .07). All statistical details of the performed analyses can be found in table 4.

Table 4

*Detailed statistical values of the analyses of the proportion of first fixation*

|  | | *df* | Test value | *p* | Effect size |
| --- | --- | --- | --- | --- | --- |
| First fixation bias within groups: one-sample *t*-test | |  |  |  |  |
| Bias score in children with SAD (*M* = .47) | 49 | *t* = -2.16 | .036 | *d* = 0.33 |
| Bias score in HC children (*M* = .46) | 45 | *t* = -2.42 | .020 | *d* = 0.40 |
| First fixation bias between groups: 2 x 2 ANOVA | |  |  |  |  |
| Group | 1, 92 | *F* = 0.31 | .58 | ηp2 = .003 |
| Stress induction condition | 1, 92 | *F* = 3.31 | .07 | ηp2 = .035 |
| Group * stress induction condition | | 1, 92 | *F* = 0.08 | .78 | ηp2 = .001 |

Furthermore, time to first fixation as another indicator for the vigilance component was analyzed beside the proportion of first fixation. Time to first fixation was calculated as the time from stimulus onset until the first fixation to either the angry or the neutral face. Considering the confounded nature of both measures of the vigilance component, given that the latency of the first fixation is always shorter than subsequent ones, a secondary analysis was performed according to Shechner et al. (2013), only based on those trials in which the angry face was initially fixated. A 2x2 ANOVA with group (SAD and HC) as between-subjects factor and facial expression (angry and neutral) as within-subjects factor yielded a significant main effect for facial expression (*F* (1, 94) = 4.26, *p* = .042, ηp2 = .043). According to a higher proportion of first fixation to neutral faces, time to first fixation to angry faces (*M* = 1088 ms, *SD* = 554 ms) was higher than time to first fixation to neutral faces (*M* = 1026 ms, *SD* = 581 ms). The mean latency of first fixation to faces did not differ significantly between groups (*F* (1, 94) = 3.85, *p* = .053, ηp2 = .039); the interaction was not significant (*F* (1, 94) = 0.03, *p* = .086, ηp2 < .001). When confining the analyzed trials to those with a first fixation to the angry face, children with SAD (*M* = 417 ms, *SD* = 264 ms) did not differ from HC children (*M* = 370 ms, *SD* = 135 ms) in the time to first fixation, as well (*Z* = -0.29, *p* = .78, *d* = 0.06). Figure 4 visualizes the time to first fixation by group and facial expression.

*Figure 4*. Time to first fixation to angry and neutral faces by group.

***Maintained attention* - overall dwell time to faces and the blank area**

For the measurement of *maintained attention* within the full 5000 ms of presentation, overall dwell time to both facial stimuli and the blank area was further investigated by summing up the duration of all fixations to each face and the blank area, respectively. A 2x3 ANOVA with group (SAD and HC) as between-subjects factor and locus of fixation (angry faces, neutral faces and the blank area) as within-subjects factor was conducted. There was no main effect for group, *F* (1,94) = 0.38, *p* = .54, ηp2 = .004. However, a significant main effect for locus of fixation occurred (*F* (2, 188) = 111.49, *p* < .001, ηp2 = .543), which was qualified by a significant interaction effect (*F* (2,188) = 6.64, *p* = .002, ηp2 = .066). Overall dwell time was longer to both facial stimuli than to the blank area and furthermore longer to neutral faces than to angry faces (all *p* > .001). Pairwise comparisons moreover yielded a significant difference between groups with regard to angry faces and the blank area. Compared with HC children, children with SAD showed a significant shorter overall dwell time to angry faces (*p* = .017, ηp2 = .059) and a significant longer overall dwell time to the blank area (*p* = .011, ηp2 = .067). Overall dwell time is displayed in figure 5.

*Figure 5*. Overall dwell time to facial stimuli and the blank area by group

**Association between measures of maintained attention and self-reported symptom severity**

Post-hoc, Spearman coefficients were computed separately for both groups to investigate the association between the level of child anxiety and the length of first fixation to angry faces. Both correlations missed statistical significance in children with SAD (SPAI-C: *r* = .02, *p* = .90; SASC-R: *r* = .08, *p* = .58) as well as in HC children (SPAI-C: *r* = -.18, *p* = .25; SASC-R: *r* = -.14, *p* = .37). Likewise, Spearman coefficients revealed no significant association between first run dwell time to angry faces and self-reported symptom severity in children with SAD (SPAI-C: *r* = -.05, *p* = .75; SASC-R: *r* = .04, *p* = .78) and in HC children (SPAI-C: *r* = -.09, *p* = .57; SASC-R: *r* = .06, *p* = .68). Figure 6 visualizes the association between both eye-tracking variables and self-reported symptom severity for both groups and questionnaires separately.

*Figure 6*. Association between self-reported symptom severity and the length of first fixation (upper part) and first run dwell time (lower part) to angry faces
